# Supplementary material
Source: MDPI journal article supplement (https://www.mdpi.com/1999-4907/8/3/63)
Supplement: s1 [file s1]

Relationship between Forest Color Characteristics and Scenic Beauty: Case Study Analyzing Pictures of Mountainous Forests at Sloped Positions in Jiuzhai Valley, China

Zhe Zhang, Guangfa Qie*, Cheng Wang, Shasha Jiang, Xi Li and Mingxia Li

1 Color Quantization Based on the HSV Model

| (a) | (b) |
| --- | --- |

**Figure S1.** Original HSV color model and normalization processing of black and white: (a) HSV color model [29]; (b) Modified HSV color model.

In the HSV color space, the hue is a 0-360° varying ring. There are different degrees of the hue circle occupied by red, magenta, blue, green, yellow and other colors that can be recognized accurately with the naked eye. That is, the true distribution of the color space is not uniform. Therefore, compared with the uniform quantization method, non-uniform color quantization can divide colors into the same groups more reasonably. This is suitable for the division of saturation and value by non-uniform color quantization [28] (Figure S2).

| (a) | (b) | (c) |
| --- | --- | --- |

**Figure S2.** Hue, Saturation and Value un-uniform quantization: (a) Hue panel; (b) Saturation Partition; (c) Value Partition.

Figure S2 represents the interval range of the hue, the value, and the saturation after non-uniform quantization. This involved converting the hue into 16 colors, where each hue had 4 levels generally with differences in saturation and value. Thereby, 256 colors were obtained. Any color that belonged to the same interval after the quantification was considered the same color.

Some colors among the 256 quantified were difficult for human eyes to distinguish. Figure S3 shows S and V color cards with a different hue. We selected one representative color in the color classification threshold to fill each interval. In the two graphs, when the value is considerably large and the saturation is very small (i.e., in Region I), the color is similar to white regardless of what the hue is. When the saturation is very small, the value is in the middle (i.e., in Region II), and the color is gray regardless of how the hue changes. When the value is very small (i.e., in Region III), the color is black. This can also be seen in Figures S2(b) and S2(c). Therefore, after non-uniform quantization, this study normalized similar colors in Regions I, II, and III into black, white, and gray, respectively, and retained the color in Region IV. Thereby, the number of colors was further simplified (Figure S1 b).

**Figure S3.** SV color table of H1 and H7 with familiar color partitions.

**Figure S4.** MATLAB application process flow.

**2 Comparison of Forest Color Element Variation Over Time**

**Figure S5.** Dynamic change of forest hue over three months. Note: “1”, “2”, “3” presents August, September, October, respectively, along the x-axis

**Table S1.** Differences in forest hue over three months.

| **Indicator** | **Proportion of different months (%)** | | | **F** | **P** |
| --- | --- | --- | --- | --- | --- |
| **August** | **September** | **October** |
| H1 | 0.050±0.039 a | 0.297±0.505 a | 1.332±1.293 b | 17.335 | <0.001 |
| H2 | 0.084±0.064 a | 0.478±0.705 a | 2.943±2.125 b | 36.296 | <0.001 |
| H3 | 0.945±0.583 a | 4.317±3.522 a | 18.999±10.477 b | 54.717 | <0.001 |
| H4 | 2.962±2.267 a | 6.918±4.369 b | 8.539±4.750 b | 7.424 | 0.001 |
| H5 | 43.121±13.772 a | 30.847±9.065 b | 18.372±9.046 c | 38.086 | <0.001 |
| H6 | 13.481±7.998 ab | 16.699±8.616 a | 9.917±6.257 b | 9.394 | <0.001 |
| H7 | 2.810±4.630 a | 3.453±2.848 a | 3.198±3.757 a | 0.167 | 0.846 |
| H8 | 1.146±1.493 a | 1.626±1.333 a | 1.826±2.050 a | 0.726 | 0.487 |
| H9 | 1.179±1.021 a | 1.562±1.248 a | 2.018±1.917 a | 1.725 | 0.183 |
| H10 | 3.413±1.716 a | 5.113±3.072 ab | 6.868±5.640 b | 3.601 | 0.031 |
| H11 | 2.313±3.305 a | 4.629±3.487 b | 3.151±3.204 a | 3.338 | 0.039 |
| H12 | 0.096±0.138 a | 0.178±0.215 a | 0.196±0.363 a | 0.533 | 0.588 |
| H13 | 0.016±0.023 a | 0.044±0.072 a | 0.064±0.123 a | 1.249 | 0.291 |
| H14 | 0.009±0.014 a | 0.027±0.046 a | 0.053±0.104 a | 2.145 | 0.122 |
| H15 | 0.006±0.010 a | 0.023±0.038 a | 0.054±0.068 b | 5.723 | 0.004 |
| H16 | 0.009±0.012 a | 0.032±0.057 a | 0.092±0.116 b | 7.142 | 0.001 |

Note: Different letters indicate significant differences at the 0.05 level.

**Table S2.** Differences in forest saturation and value over three months.

| **Indicator** | **Proportion of different months (%)** | | | **F** | **P** |
| --- | --- | --- | --- | --- | --- |
| **August** | **September** | **October** |
| Grey | 17.748±8.681 a | 15.107±6.362 a | 14.733±8.572 a | 0.694 | 0.502 |
| Black | 8.924±7.926 a | 6.584±4.266 a | 6.296±4.418 a | 1.352 | 0.263 |
| White | 1.678±2.077 a | 2.057±2.681 a | 1.339±1.573 a | 1.268 | 0.286 |
| S1 | 34.362±5.904 a | 46.792±9.584 b | 47.251±8.673 b | 10.086 | <0.001 |
| S2 | 32.029±9.021 a | 28.300±9.740 a | 29.099±13.753 a | 0.448 | 0.640 |
| S3 | 5.256±6.373 a | 1.158±1.757 b | 1.278±2.293 b | 10.273 | <0.001 |
| V1 | 34.585±11.568 a | 32.736±10.259 a | 32.669±10.899 a | 0.153 | 0.858 |
| V2 | 33.367±12.209 a | 37.386±11.845 a | 38.172±12.391 a | 0.702 | 0.498 |
| V3 | 3.694±5.517 a | 6.128±5.442 a | 6.787±5.375 a | 1.460 | 0.237 |

Note: Different letters indicate significant differences at the 0.05 level.

**Table S3.** Differences in forest color numbers over three months.

| **Indicator** | **Index of different months** | | | **F** | **P** |
| --- | --- | --- | --- | --- | --- |
| **August** | **September** | **October** |
| NC | 14.636±1.106 a | 19.889±0.547 b | 22.292±0.529 c | 1791.006 | <0.001 |
| MHI | 0.453±0.025 a | 0.325±0.012 b | 0.253±0.012 c | 1131.437 | <0.001 |

Note: Different letters indicate significant differences at the 0.05 level.

**3. Values of six simplified factors and significant correlation factors about pictures in Figure 1**

**Table S4.** Values of six simplified factors and significant correlation factors about pictures.

| **Indicator** | **(1a)** | **(1b)** | **(2a)** | **(2b)** | **(3a)** | **(3b)** | **(4a)** | **(4b)** |
| --- | --- | --- | --- | --- | --- | --- | --- | --- |
| SBE | 50.27 | 53.06 | 27.61 | 36.58 | 26.22 | 53.91 | -36.18 | -18.48 |
| PC1 | -0.15 | -0.26 | -0.16 | -0.03 | 0.06 | -0.03 | -2.13 | -1.49 |
| PC2 | 0.93 | 1.24 | -0.21 | -0.67 | -0.85 | -0.59 | -0.28 | -0.44 |
| PC3 | -0.24 | 0.23 | -0.52 | -0.11 | -0.73 | 2.37 | -0.55 | 0.05 |
| PC4 | -0.57 | -0.87 | -0.21 | -0.94 | -0.42 | 0.41 | -0.67 | -0.37 |
| PC5 | 0.13 | -0.08 | -0.17 | 0.39 | -0.29 | -0.28 | -1.04 | -2.57 |
| PC6 | 0.71 | -0.13 | 0.39 | 0.44 | 1.14 | -0.44 | -2.89 | -1.88 |
| H1 (%) | 0.00 | 0.00 | 0.00 | 0.00 | 0.00 | 0.05 | 0.00 | 0.01 |
| H2 (%) | 0.00 | 0.02 | 0.00 | 0.02 | 0.00 | 0.07 | 0.00 | 0.02 |
| H3 (%) | 0.01 | 0.10 | 0.02 | 0.14 | 0.00 | 0.24 | 0.01 | 0.06 |
| H5 (%) | 0.17 | 0.14 | 0.30 | 0.29 | 0.50 | 0.15 | 0.32 | 0.11 |
| H7 (%) | 0.06 | 0.06 | 0.04 | 0.00 | 0.01 | 0.01 | 0.02 | 0.01 |
| H8 (%) | 0.04 | 0.05 | 0.01 | 0.00 | 0.00 | 0.00 | 0.02 | 0.00 |
| H9 (%) | 0.03 | 0.04 | 0.01 | 0.01 | 0.00 | 0.00 | 0.01 | 0.01 |
| Grey (%) | 0.12 | 0.17 | 0.14 | 0.11 | 0.24 | 0.22 | 0.27 | 0.39 |
| Black (%) | 0.13 | 0.07 | 0.07 | 0.19 | 0.05 | 0.03 | 0.05 | 0.06 |
| S2 (%) | 0.27 | 0.29 | 0.24 | 0.32 | 0.34 | 0.31 | 0.22 | 0.05 |
| V1 (%) | 0.38 | 0.48 | 0.37 | 0.41 | 0.37 | 0.29 | 0.41 | 0.30 |
| V2 (%) | 0.32 | 0.27 | 0.37 | 0.25 | 0.32 | 0.39 | 0.25 | 0.22 |
| V3 (%) | 0.04 | 0.01 | 0.04 | 0.04 | 0.01 | 0.08 | 0.00 | 0.01 |
| NC (num) | 23 | 20 | 17 | 20 | 10 | 27 | 17 | 14 |
| AP (%) | 0.70 | 0.71 | 0.80 | 0.80 | 0.62 | 0.62 | 0.98 | 0.94 |
| SP (%) | 0.30 | 0.29 | 0.20 | 0.20 | 0.38 | 0.38 | 0.02 | 0.06 |
| CD (num) | 2 | 3 | 1 | 1 | 1 | 3 | 1 | 1 |
| LPI | 66.03 | 68.22 | 57.66 | 57.39 | 61.31 | 61.04 | 98.47 | 93.88 |
| CON | 49.09 | 59.42 | 52.97 | 52.44 | 43.76 | 63.28 | 93.55 | 81.10 |
| DIV | 0.53 | 0.50 | 0.58 | 0.59 | 0.58 | 0.59 | 0.03 | 0.12 |
| SHDI | 0.61 | 0.79 | 0.97 | 0.98 | 0.66 | 0.67 | 0.08 | 0.23 |
| SIEI | 0.84 | 0.68 | 0.87 | 0.87 | 0.94 | 0.71 | 0.06 | 0.23 |
| COH | 99.64 | 99.68 | 99.68 | 99.64 | 99.63 | 99.62 | 99.94 | 99.81 |
| ARP (%) | 0.07 | 0.06 | 0.20 | 0.13 | 0.05 | 0.03 | 0.33 | 0.11 |

**4 Classification of the Forest Color Landscape in Jiuzhai Valley**

**Table S5.** Differences of forest color variables in six categories.

| **Indicator** | **T1** | | | | **T2** | | | **T3** |
| --- | --- | --- | --- | --- | --- | --- | --- | --- |
| **Total** | **T1-1** | **T1-2** | **T1-3** | **Total** | **T2-1** | **T2-2** | **Total** |
| H1 | 0.01±0.01A | 0.01±0.01a | 0.00±0.01b | 0.01±0.01ab | 0.00±0.00A | 0.00±0.00ab | 0.00±0.01ab | 0.00±0.00Aab |
| H2 | 0.01±0.02A | 0.02±0.02a | 0.01±0.01b | 0.01±0.02b | 0.01±0.01A | 0.01±0.01ab | 0.01±0.01b | 0.00±0.00Ab |
| H3 | 0.09±0.10A | 0.16±0.13a | 0.06±0.07b | 0.06±0.04b | 0.05±0.04A | 0.06±0.05b | 0.03±0.03b | 0.02±0.01Ab |
| H5 | 0.28±0.13A | 0.24±0.15a | 0.30±0.11a | 0.31±0.10a | 0.29±0.14A | 0.28±0.13a | 0.30±0.16a | 0.38±0.09Aa |
| H7 | 0.04±0.04A | 0.04±0.04a | 0.04±0.04a | 0.04±0.04a | 0.03±0.04A | 0.04±0.06a | 0.02±0.02a | 0.01±0.01Aa |
| H8 | 0.02±0.02A | 0.02±0.02a | 0.02±0.01a | 0.02±0.02a | 0.01±0.01A | 0.02±0.02a | 0.01±0.00a | 0.01±0.01Aa |
| H9 | 0.02±0.02A | 0.02±0.02a | 0.02±0.01a | 0.02±0.01a | 0.01±0.01A | 0.02±0.02a | 0.01±0.01a | 0.00±0.00Aa |
| Grey | 0.14±0.06A | 0.12±0.07a | 0.15±0.06a | 0.13±0.05a | 0.23±0.11B | 0.15±0.07a | 0.31±0.08b | 0.25±0.06Bb |
| Black | 0.07±0.05A | 0.05±0.03a | 0.07±0.05a | 0.08±0.05a | 0.07±0.05A | 0.07±0.07a | 0.06±0.02a | 0.11±0.09Aa |
| S2 | 0.31±0.10A | 0.36±0.12a | 0.28±0.09b | 0.32±0.06ab | 0.23±0.13B | 0.30±0.12ab | 0.16±0.12c | 0.27±0.11ABabc |
| V1 | 0.32±0.11A | 0.28±0.10a | 0.32±0.11ab | 0.38±0.11b | 0.37±0.08A | 0.34±0.09ab | 0.40±0.05b | 0.39±0.03Aab |
| V2 | 0.39±0.11A | 0.44±0.11a | 0.37±0.10b | 0.35±0.11bc | 0.29±0.11B | 0.36±0.11abc | 0.22±0.05d | 0.23±0.16Bcd |
| V3 | 0.07±0.06A | 0.09±0.05a | 0.07±0.06ab | 0.04±0.05bc | 0.02±0.04B | 0.04±0.04abc | 0.00±0.00c | 0.01±0.01ABbc |
| NC | 20.57±4.15A | 22.24±3.85a | 19.65±4.05b | 20.08±4.35ab | 17.92±4.42B | 21.00±4.15ab | 14.83±1.72c | 13.00±3.46Bc |
| AP | 0.51±0.21A | 0.52±0.17a | 0.52±0.21a | 0.46±0.27a | 0.81±0.18B | 0.79±0.17b | 0.83±0.19b | 0.81±0.31Bb |
| SP | 0.42±0.24A | 0.40±0.20ab | 0.41±0.23ab | 0.47±0.31b | 0.19±0.18B | 0.21±0.17ac | 0.17±0.20c | 0.19±0.31ABabc |
| CD | 1.95±0.82A | 2.43±0.87a | 1.61±0.62bc | 2.00±0.82ab | 1.17±0.39B | 1.17±0.41c | 1.17±0.41c | 1.00±0.00Bc |
| LPI | 53.58±15.44A | 53.18±15.11a | 55.47±15.45a | 49.7±16.35a | 74.02±25.25B | 73.96±24.16b | 74.08±28.62b | 80.07±33.2Bb |
| CON | 55.99±6.81A | 56.59±6.86a | 54.56±7.01a | 58.46±5.84ab | 69.52±15.71B | 68.91±9.87bc | 70.14±21.09c | 52.62±47.86Aab |
| DIV | 0.62±0.15A | 0.62±0.14a | 0.61±0.14a | 0.66±0.17a | 0.35±0.28B | 0.37±0.28b | 0.34±0.32b | 0.26±0.42Bb |
| SHDI | 0.96±0.34A | 0.91±0.30a | 0.94±0.35a | 1.09±0.38a | 0.51±0.41B | 0.50±0.30b | 0.52±0.53b | 0.37±0.58Bb |
| SIEI | 0.80±0.12A | 0.80±0.10a | 0.81±0.13a | 0.78±0.12a | 0.50±0.32B | 0.50±0.24b | 0.50±0.41b | 0.26±0.41Cb |
| COH | 99.58±0.16A | 99.60±0.14a | 99.59±0.12a | 99.53±0.24a | 99.76±0.16B | 99.75±0.16b | 99.76±0.17b | 99.82±0.25Bb |
| ARP | 0.08±0.05A | 0.08±0.03a | 0.08±0.05a | 0.09±0.06a | 0.17±0.13B | 0.12±0.09ab | 0.22±0.16b | 0.47±0.48Cc |

Note: Different letters indicate significant differences at the 0.05 level.
